# Supplementary material for: Concurrent self-regulated autonomous synthesis and functionalization of pH-responsive giant vesicles by a chemical pH oscillator
Source: Royal Society of Chemistry journal article supplement (doi:10.1039/d1sm00150g), 2021-01-01
Supplement: d1sm00150g1.pdf [file d1sm00150g1.pdf]

# 1 Supplementary Materials

2

| No. | Reactions                                                                                                                              | Rate Constants (at 45 °C)                                                                                     |
|-----|----------------------------------------------------------------------------------------------------------------------------------------|---------------------------------------------------------------------------------------------------------------|
| R1. | $\text{SO}_3^{2-} + \text{H}^+ \leftrightarrow \text{HSO}_3^-$                                                                         | $k_1=2.0 \times 10^{10} \text{ M}^{-1} \text{ s}^{-1}$ $k_{-1}=2.0 \times 10^3 \text{ M}^{-1} \text{ s}^{-1}$ |
| R2. | $\text{HSO}_3^- + \text{H}^+ \leftrightarrow \text{H}_2\text{SO}_3$                                                                    | $k_2=12.0 \times 10^9 \text{ M}^{-1} \text{ s}^{-1}$ $k_{-2}=2.0 \times 10^8 \text{ M}^{-1} \text{ s}^{-1}$   |
| R3. | $3 \text{HSO}_3^- + \text{BrO}_3^- \rightarrow 3 \text{SO}_4^{2-} + \text{Br}^- + 3 \text{H}^+$                                        | $k_3=0.13 \text{ M}^{-1} \text{ s}^{-1}$                                                                      |
| R4. | $3 \text{H}_2\text{SO}_3 + \text{BrO}_3^- \rightarrow 3 \text{SO}_4^{2-} + \text{Br}^- + 6 \text{H}^+$                                 | $k_4=30 \text{ M}^{-1} \text{ s}^{-1}$                                                                        |
| R5. | $6 \text{H}_2\text{SO}_3 + \text{BrO}_3^- \rightarrow 3 \text{S}_2\text{O}_6^{2-} + \text{Br}^- + 3 \text{H}_2\text{O} + 6 \text{H}^+$ | $k_5=2 \text{ M}^{-1} \text{ s}^{-1}$                                                                         |

3 **Table S1.** The most important composite reactions of the  $\text{BrO}_3^- - \text{SO}_3^{2-}$  pH oscillator and the rate constants at 45 °C (41,42).

4

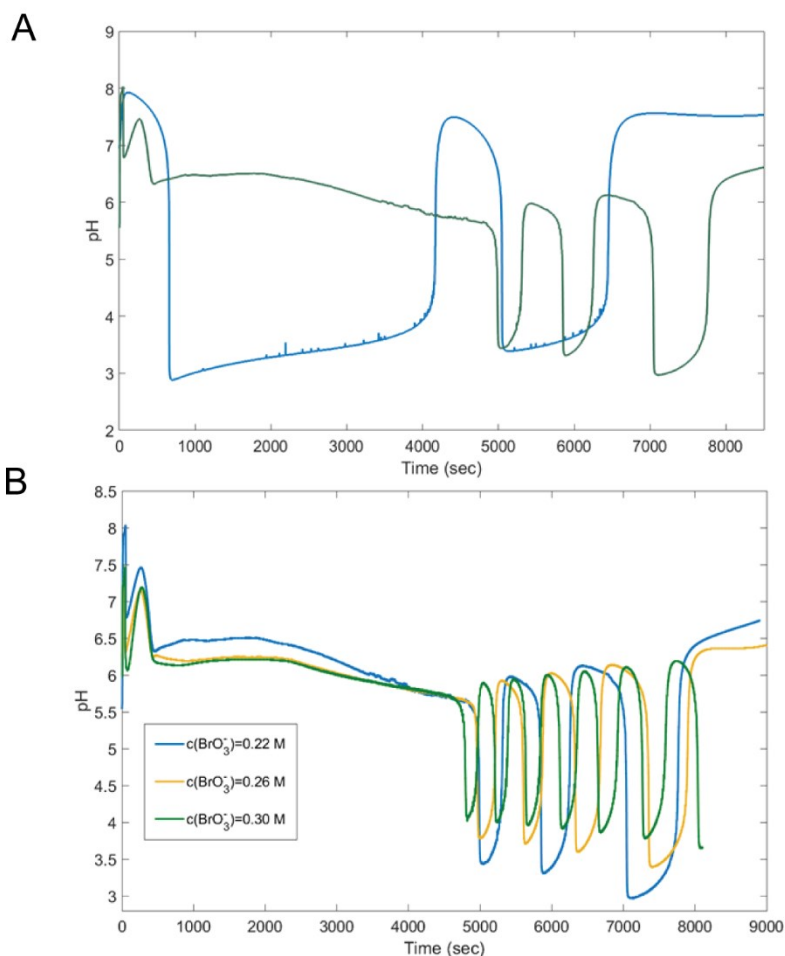

5

6 **Figure S1. pH oscillation at different reaction conditions.** (A) in the pure system when  $\text{Na}_2\text{SO}_3$  ( $c=2.0$  M) and  $\text{H}_2\text{SO}_4$  ( $c=0.0675$   
7 M) was inflowed at a rate of 0.08 ml/min to 15.0  $\text{cm}^3$  solution of 0.22 M  $\text{NaBrO}_3$  at  $T = 40^\circ\text{C}$  (blue line) and in the coupled  
8 system containing 6  $\mu\text{mol}$   $\text{PEG}_{45}\text{-CTA}$  and 360  $\mu\text{mol}$   $\text{DPA}$  (other experimental conditions are the same) (green line). (B) pH  
9 oscillations when the solution of  $\text{Na}_2\text{SO}_3$  ( $c=2.0$  M) and  $\text{H}_2\text{SO}_4$  ( $c=0.0675$  M) was inflowed at a rate of 0.08 ml/min to 15.0  $\text{cm}^3$   
10 solution of 0.22 M (blue), 0.26 M (yellow) or 0.3 M (green)  $\text{NaBrO}_3$  containing 6  $\mu\text{mol}$   $\text{PEG}_{45}\text{-CTA}$  and 360  $\mu\text{mol}$   $\text{DPA}$  at  $T = 40$   
11  $^\circ\text{C}$ .

12

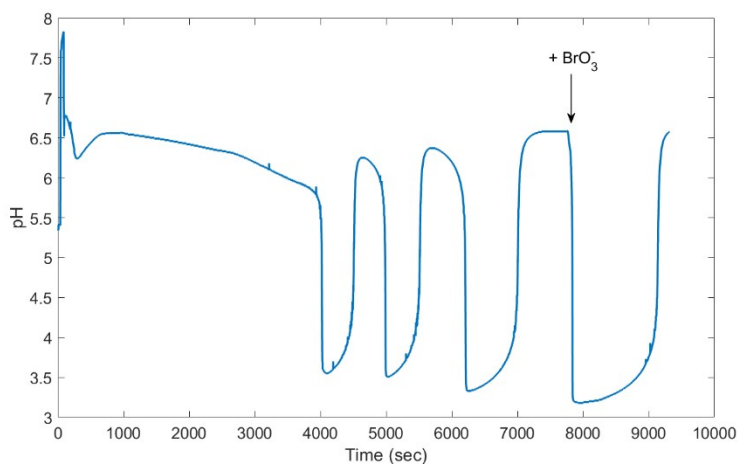

13

14 **Figure S2. The revival of the pH oscillation after the addition of extra  $\text{BrO}_3^-$  (1 ml of 0.6 M  $\text{Na BrO}_3$ ).** Original conditions:  
15 15.0  $\text{cm}^3$  solution of 0.22 M  $\text{NaBrO}_3$  containing 6  $\mu\text{mol}$   $\text{PEG}_{45}\text{-CTA}$  and 360  $\mu\text{mol}$   $\text{DPA}$  to which  $\text{Na}_2\text{SO}_3$  ( $c=2.0$  M) and  $\text{H}_2\text{SO}_4$   
16 ( $c=0.0675$  M) was inflowed at a rate of 0.08 ml/min at  $T = 40^\circ\text{C}$ .

17

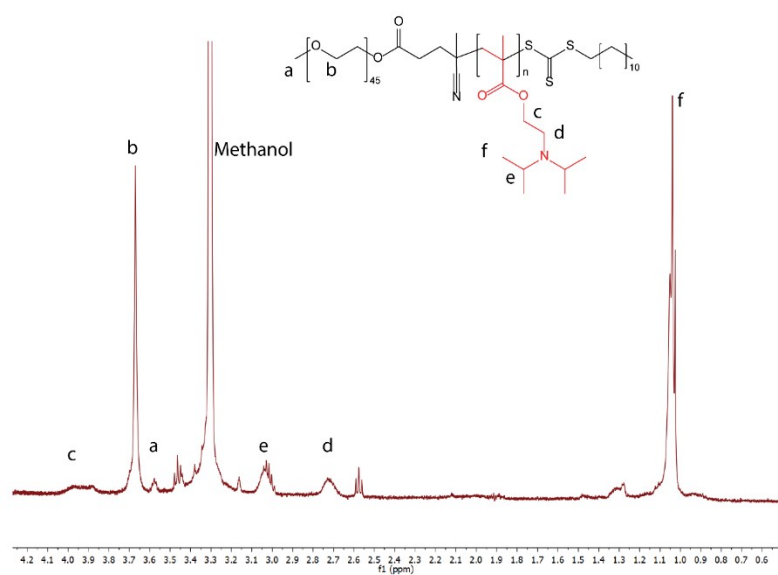

**Figure S3.  $^1\text{H}$ -NMR spectrum of PEG-b-PDPA**

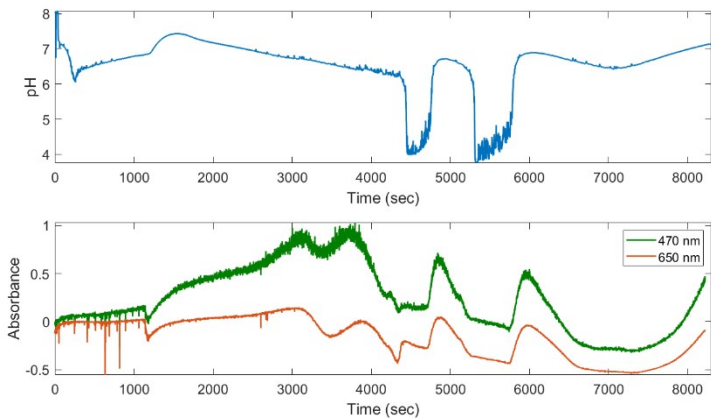

23  
24 **Figure S4. Measured pH oscillations and the absorbance in time at two wavelengths.** The solution of Na<sub>2</sub>SO<sub>3</sub> (c=2.0 M) and  
25 H<sub>2</sub>SO<sub>4</sub> (c=0.06 M) was inflowed at a rate of 0.08ml/min to 15.0 cm<sup>3</sup> solution of 0.22 M NaBrO<sub>3</sub> containing 6 μmol PEG<sub>45</sub>-CTA  
26 and 360 μmol DPA at T = 40 °C.

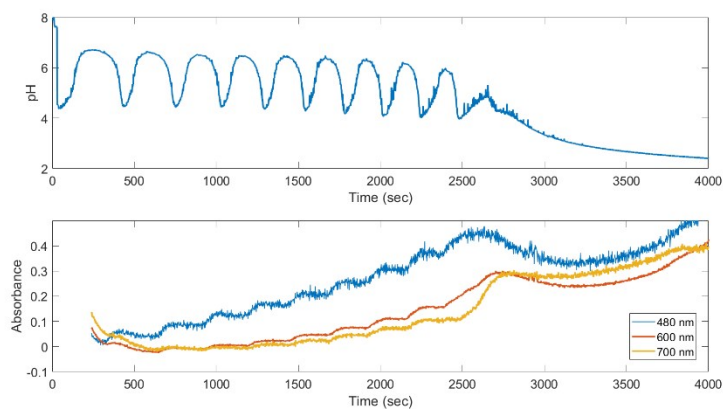

29  
 30 **Figure S5. Measured pH oscillations and the absorbance in time at 3 wavelengths.** The solution of  $\text{Na}_2\text{SO}_3$  ( $c=2.0$  M) and  
 31  $\text{H}_2\text{SO}_4$  ( $c=0.125$  M) was inflowed at a rate of  $0.08\text{ml/min}$  to  $15.0\text{ cm}^3$  solution of  $0.20$  M  $\text{NaBrO}_3$  and  $0.04$  m  $\text{K}_4\text{Fe}(\text{CN})_6$   
 32 containing  $6\text{ }\mu\text{mol}$   $\text{PEG}_{45}\text{-CTA(2S)}$ ,  $390\text{ }\mu\text{mol}$  BA and  $60\text{ }\mu\text{mol}$  AA at  $T = 20\text{ }^\circ\text{C}$ .

33  
 34  
 35
